# Supplementary material for: Infrared spectra of amorphous and crystalline urea ices
Source: Royal Society of Chemistry journal article supplement (doi:10.1039/d1cp03503g), 2021-01-01
Supplement: d1cp03503g1.pdf [file d1cp03503g1.pdf]

## Supporting Information for:

### **Infrared spectra of amorphous and crystalline urea ices**

<sup>1</sup> Instituto de Estructura de la Materia (IEM-CSIC), Serrano 121-123, 28006 Madrid, Spain

Vicente Timón, Belén Maté, Victor Herrero, and Isabel Tanarro.

We report here the calculated structures, in .cif fileformat, used in the DFT– B3LYP calculations.

Also, in Table S1 we report the main crystallographic parameters obtained and compared with experimental results.

Finally, in Figure S1, we present the IR spectra of three individual 2urea:8H<sub>2</sub>O structures, and the corresponding average spectrum.

```

data Urea-molecule optimized
_audit_creation_date      2021-07-27
_audit_creation_method    'Materials Studio'
_symmetry_space_group_name_H-M  'P1'
_symmetry_Int_Tables_number  1
_symmetry_cell_setting    triclinic
loop_
_symmetry_equiv_pos_as_xyz
  x,y,z
_cell_length_a            10.0000
_cell_length_b            10.0000
_cell_length_c            10.0000
_cell_angle_alpha        90.0000
_cell_angle_beta         90.0000
_cell_angle_gamma        90.0000
loop_
_atom_site_label
_atom_site_type_symbol
_atom_site_fract_x
_atom_site_fract_y
_atom_site_fract_z
_atom_site_U_iso_or_equiv
_atom_site_adp_type
_atom_site_occupancy
C1      C      -0.50739   0.48563   0.46622   0.00000   Uiso   1.00
O2      O      -0.39547   0.53096   0.48480   0.00000   Uiso   1.00
N3      N      -0.61222   0.50151   0.55760   0.00000   Uiso   1.00
H4      H      -0.59509   0.57183   0.62845   0.00000   Uiso   1.00
H5      H      -0.70786   0.49536   0.52460   0.00000   Uiso   1.00
N6      N      -0.54217   0.41316   0.35161   0.00000   Uiso   1.00
H7      H      -0.46277   0.38123   0.29747   0.00000   Uiso   1.00
H8      H      -0.62025   0.34871   0.35614   0.00000   Uiso   1.00
loop_
_geom_bond_atom_site_label_1
_geom_bond_atom_site_label_2
_geom_bond_distance
_geom_bond_site_symmetry_2
_ccdc_geom_bond_type
C1      O2      1.222   .   D
C1      N3      1.400   .   S
C1      N6      1.400   .   S
N3      H4      1.013   .   S
N3      H5      1.014   .   S
N6      H7      1.013   .   S
N6      H8      1.013   .   S

```

```

data Urea-crystal-Optimized
_audit_creation_date      2021-07-27
_audit_creation_method    'Materials Studio'
_symmetry_space_group_name_H-M  'P-421M'
_symmetry_Int_Tables_number  113
_symmetry_cell_setting    tetragonal
loop_
_symmetry_equiv_pos_as_xyz
  x,y,z
  -x,-y,z
  y,-x,-z
  -y,x,-z
  -x+1/2,y+1/2,-z
  x+1/2,-y+1/2,-z
  -y+1/2,-x+1/2,z
  y+1/2,x+1/2,z
_cell_length_a            5.4531
_cell_length_b            5.4531
_cell_length_c            4.7110
_cell_angle_alpha         90.0000
_cell_angle_beta          90.0000
_cell_angle_gamma         90.0000
loop_
_atom_site_label
_atom_site_type_symbol
_atom_site_fract_x
_atom_site_fract_y
_atom_site_fract_z
_atom_site_U_iso_or_equiv
_atom_site_adp_type
_atom_site_occupancy
C1      C      0.00000  0.50000  0.31815  2.67864  Uani  1.00
O1      O      0.00000  0.50000  0.58775  4.05586  Uani  1.00
N1      N      0.15042  0.65042  0.16844  5.40178  Uani  1.00
H1      H      0.26584  0.76584  0.27394  7.68386  Uani  1.00
H2      H      0.14917  0.64917  0.95273  7.43091  Uani  1.00
loop_
_atom_site_aniso_label
_atom_site_aniso_U_11
_atom_site_aniso_U_22
_atom_site_aniso_U_33
_atom_site_aniso_U_12
_atom_site_aniso_U_13
_atom_site_aniso_U_23
C1      3.54011  3.54011  0.95569  0.00000  0.00000  0.00000
O1      5.63405  5.63405  0.89947  0.00000  0.00000  0.00000
N1      7.32126  7.32126  1.56283  0.00000  -0.09110  -0.09110
H1      9.53571  9.53571  3.98016  0.00000  -0.44249  -0.44249
H2      10.12321 10.12321  2.04630  0.00000  -0.29933  -0.29933
loop_
_geom_bond_atom_site_label_1
_geom_bond_atom_site_label_2
_geom_bond_distance
_geom_bond_site_symmetry_2
_ccdc_geom_bond_type
C1      O1      1.270  .      D
C1      N1      1.358  .      S
C1      N1      1.358  2_565 S
N1      H1      1.019  .      S
N1      H2      1.016  1_554 S
H2      N1      1.016  1_556 S

```

```

data Urea-amorphous-6mol-Optimized
_audit_creation_date      2021-07-27
_audit_creation_method    'Materials Studio'
_symmetry_space_group_name_H-M  'P1'
_symmetry_Int_Tables_number  1
_symmetry_cell_setting    triclinic
loop_
_symmetry_equiv_pos_as_xyz
  x,y,z
_cell_length_a            7.2114
_cell_length_b            8.0794
_cell_length_c            7.5108
_cell_angle_alpha        96.3110
_cell_angle_beta         92.5960
_cell_angle_gamma        90.4790
loop_
_atom_site_label
_atom_site_type_symbol
_atom_site_fract_x
_atom_site_fract_y
_atom_site_fract_z
_atom_site_U_iso_or_equiv
_atom_site_adp_type
_atom_site_occupancy
C1      C      0.54700  0.17406  0.17473  0.00000  Uiso  1.00
O2      O      0.65409  0.26880  0.10632  0.00000  Uiso  1.00
N3      N      0.50803  0.01307  0.09820  0.00000  Uiso  1.00
H4      H      0.54865  -0.01083 -0.03014  0.00000  Uiso  1.00
H5      H      0.38103  -0.03644  0.12109  0.00000  Uiso  1.00
N6      N      0.47003  0.21670  0.33710  0.00000  Uiso  1.00
H7      H      0.45223  0.33936  0.37780  0.00000  Uiso  1.00
H8      H      0.37159  0.13967  0.37721  0.00000  Uiso  1.00
C9      C      0.10379  0.51788  0.40264  0.00000  Uiso  1.00
O10     O      0.24570  0.48670  0.49465  0.00000  Uiso  1.00
N11     N      -0.06740  0.53515  0.47292  0.00000  Uiso  1.00
H12     H      -0.07763  0.51725  0.60561  0.00000  Uiso  1.00
H13     H      -0.16624  0.59877  0.40947  0.00000  Uiso  1.00
N14     N      0.11273  0.52641  0.22187  0.00000  Uiso  1.00
H15     H      0.23889  0.54757  0.17483  0.00000  Uiso  1.00
H16     H      0.00153  0.55378  0.14368  0.00000  Uiso  1.00
C17     C      0.45014  0.60296  0.94186  0.00000  Uiso  1.00
O18     O      0.33335  0.71052  0.91654  0.00000  Uiso  1.00
N19     N      0.55974  0.60721  1.10046  0.00000  Uiso  1.00
H20     H      0.52146  0.68986  1.20350  0.00000  Uiso  1.00
H21     H      0.61219  0.49495  1.13132  0.00000  Uiso  1.00
N22     N      0.48830  0.47489  0.81367  0.00000  Uiso  1.00
H23     H      0.39124  0.45216  0.71092  0.00000  Uiso  1.00
H24     H      0.57189  0.38276  0.85031  0.00000  Uiso  1.00
C25     C      -0.01106  0.89636  1.16539  0.00000  Uiso  1.00
O26     O      0.13868  0.96960  1.20603  0.00000  Uiso  1.00
N27     N      -0.15100  0.89387  1.28634  0.00000  Uiso  1.00
H28     H      -0.12888  0.97738  1.39674  0.00000  Uiso  1.00
H29     H      -0.28341  0.89569  1.23154  0.00000  Uiso  1.00
N30     N      -0.05014  0.80955  0.99766  0.00000  Uiso  1.00
H31     H      0.06544  0.76891  0.93290  0.00000  Uiso  1.00
H32     H      -0.15850  0.72685  0.98725  0.00000  Uiso  1.00
C33     C      0.00867  0.28111  0.80073  0.00000  Uiso  1.00
O34     O      -0.07232  0.41724  0.82161  0.00000  Uiso  1.00
N35     N      0.00266  0.18085  0.63659  0.00000  Uiso  1.00
H36     H      -0.03767  0.24347  0.53173  0.00000  Uiso  1.00
H37     H      0.11378  0.10469  0.61287  0.00000  Uiso  1.00
N38     N      0.10802  0.21836  0.93653  0.00000  Uiso  1.00
H39     H      0.09571  0.27667  1.06195  0.00000  Uiso  1.00
H40     H      0.14597  0.09744  0.92659  0.00000  Uiso  1.00
C41     C      0.48110  0.91042  0.61177  0.00000  Uiso  1.00
O42     O      0.32562  0.96742  0.58418  0.00000  Uiso  1.00
N43     N      0.52678  0.74796  0.55009  0.00000  Uiso  1.00
H44     H      0.41336  0.66952  0.53096  0.00000  Uiso  1.00
H45     H      0.62993  0.69713  0.62225  0.00000  Uiso  1.00
N46     N      0.62244  1.00487  0.70553  0.00000  Uiso  1.00
H47     H      0.60465  1.12962  0.71672  0.00000  Uiso  1.00
H48     H      0.75706  0.97004  0.69890  0.00000  Uiso  1.00
loop_
_geom_bond_atom_site_label_1
_geom_bond_atom_site_label_2
_geom_bond_distance
_geom_bond_site_symmetry_2

```

| <u>_ccdc_geom_bond_type</u> |     |       |   |   |
|-----------------------------|-----|-------|---|---|
| C1                          | O2  | 1.249 | . | D |
| C1                          | N3  | 1.384 | . | S |
| C1                          | N6  | 1.373 | . | S |
| N3                          | H4  | 1.019 | . | S |
| N3                          | H5  | 1.026 | . | S |
| N6                          | H7  | 1.015 | . | S |
| N6                          | H8  | 1.018 | . | S |
| C9                          | O10 | 1.252 | . | D |
| C9                          | N11 | 1.367 | . | S |
| C9                          | N14 | 1.371 | . | S |
| N11                         | H12 | 1.028 | . | S |
| N11                         | H13 | 1.014 | . | S |
| N14                         | H15 | 1.011 | . | S |
| N14                         | H16 | 1.013 | . | S |
| C17                         | O18 | 1.239 | . | D |
| C17                         | N19 | 1.396 | . | S |
| C17                         | N22 | 1.372 | . | S |
| N19                         | H20 | 1.015 | . | S |
| N19                         | H21 | 1.031 | . | S |
| N22                         | H23 | 1.018 | . | S |
| N22                         | H24 | 1.015 | . | S |
| C25                         | O26 | 1.237 | . | D |
| C25                         | N27 | 1.389 | . | S |
| C25                         | N30 | 1.389 | . | S |
| N27                         | H28 | 1.016 | . | S |
| N27                         | H29 | 1.023 | . | S |
| N30                         | H31 | 1.022 | . | S |
| N30                         | H32 | 1.018 | . | S |
| C33                         | O34 | 1.248 | . | D |
| C33                         | N35 | 1.397 | . | S |
| C33                         | N38 | 1.365 | . | S |
| N35                         | H36 | 1.015 | . | S |
| N35                         | H37 | 1.024 | . | S |
| N38                         | H39 | 1.014 | . | S |
| N38                         | H40 | 1.013 | . | S |
| C41                         | O42 | 1.233 | . | D |
| C41                         | N43 | 1.391 | . | S |
| C41                         | N46 | 1.386 | . | S |
| N43                         | H44 | 1.026 | . | S |
| N43                         | H45 | 1.016 | . | S |
| N46                         | H47 | 1.012 | . | S |
| N46                         | H48 | 1.015 | . | S |

```

data_Urea-amorphous-4 (CH4N2O) -6 (H2O)
_audit_creation_date      2021-07-27
_audit_creation_method    'Materials Studio'
_symmetry_space_group_name_H-M  'P1'
_symmetry_Int_Tables_number  1
_symmetry_cell_setting    triclinic
loop_
_symmetry_equiv_pos_as_xyz
  x,y,z
_cell_length_a            7.5108
_cell_length_b            7.2798
_cell_length_c            8.0620
_cell_angle_alpha        88.8951
_cell_angle_beta         90.9266
_cell_angle_gamma        96.3142
loop_
_atom_site_label
_atom_site_type_symbol
_atom_site_fract_x
_atom_site_fract_y
_atom_site_fract_z
_atom_site_U_iso_or_equiv
_atom_site_adp_type
_atom_site_occupancy
C1      C      0.51530  0.36689  0.55189  0.00000  Uiso  1.00
O2      O      0.48897  0.35240  0.70377  0.00000  Uiso  1.00
N3      N      0.66243  0.30508  0.48106  0.00000  Uiso  1.00
H4      H      0.76794  0.28625  0.55930  0.00000  Uiso  1.00
H5      H      0.69051  0.33744  0.36096  0.00000  Uiso  1.00
N6      N      0.39904  0.44415  0.44413  0.00000  Uiso  1.00
H7      H      0.28081  0.46959  0.49357  0.00000  Uiso  1.00
H8      H      0.38753  0.39743  0.32577  0.00000  Uiso  1.00
C9      C      0.22402  0.69486  0.92165  0.00000  Uiso  1.00
O10     O      0.22340  0.85370  0.85870  0.00000  Uiso  1.00
N11     N      0.27821  0.67459  1.08852  0.00000  Uiso  1.00
H12     H      0.24802  0.78019  1.16012  0.00000  Uiso  1.00
H13     H      0.24416  0.54616  1.13973  0.00000  Uiso  1.00
N14     N      0.18099  0.53827  0.83791  0.00000  Uiso  1.00
H15     H      0.14163  0.54532  0.71656  0.00000  Uiso  1.00
H16     H      0.19535  0.41255  0.88990  0.00000  Uiso  1.00
C17     C      0.68854  0.82735  0.59763  0.00000  Uiso  1.00
O18     O      0.76035  0.68740  0.63776  0.00000  Uiso  1.00
N19     N      0.62727  0.93808  0.71705  0.00000  Uiso  1.00
H20     H      0.61615  0.87831  0.83246  0.00000  Uiso  1.00
H21     H      0.53778  1.02860  0.68598  0.00000  Uiso  1.00
N22     N      0.67976  0.89072  0.43505  0.00000  Uiso  1.00
H23     H      0.68649  0.79457  0.34626  0.00000  Uiso  1.00
H24     H      0.59755  0.98940  0.40716  0.00000  Uiso  1.00
C25     C      0.09646  0.17172  0.18723  0.00000  Uiso  1.00
O26     O      0.23355  0.27258  0.13736  0.00000  Uiso  1.00
N27     N      0.02950  0.01928  0.10284  0.00000  Uiso  1.00
H28     H      0.09201  -0.01128  -0.00374  0.00000  Uiso  1.00
H29     H      -0.09051  -0.05186  0.13067  0.00000  Uiso  1.00
N30     N      0.01322  0.20662  0.33156  0.00000  Uiso  1.00
H31     H      0.03682  0.33434  0.38274  0.00000  Uiso  1.00
H32     H      -0.09850  0.12386  0.36610  0.00000  Uiso  1.00
H33     H      0.16320  1.03270  0.50507  0.00000  Uiso  1.00
H34     H      0.22813  0.90729  0.64632  0.00000  Uiso  1.00
O35     O      0.23381  0.93050  0.52524  0.00000  Uiso  1.00
H36     H      0.66118  0.42304  0.84459  0.00000  Uiso  1.00
H37     H      0.69528  0.33044  1.01262  0.00000  Uiso  1.00
O38     O      0.74615  0.43189  0.93998  0.00000  Uiso  1.00
H39     H      0.90151  0.30311  0.80614  0.00000  Uiso  1.00
H40     H      0.85548  0.10760  0.74275  0.00000  Uiso  1.00
O41     O      0.94023  0.21743  0.72536  0.00000  Uiso  1.00
H42     H      1.11171  0.70950  0.47783  0.00000  Uiso  1.00
H43     H      0.93068  0.60665  0.53169  0.00000  Uiso  1.00
O44     O      1.04621  0.58467  0.48235  0.00000  Uiso  1.00
H45     H      0.52968  0.71897  0.08341  0.00000  Uiso  1.00
H46     H      0.70404  0.65115  0.01766  0.00000  Uiso  1.00
O47     O      0.65757  0.76033  0.06654  0.00000  Uiso  1.00
H48     H      0.59295  0.02526  0.08294  0.00000  Uiso  1.00
H49     H      0.44985  0.16371  0.11030  0.00000  Uiso  1.00
O50     O      0.57485  0.14241  0.13183  0.00000  Uiso  1.00
loop_
_geom_bond_atom_site_label_1
_geom_bond_atom_site_label_2

```

| _geom_bond_distance        |     |       |   |   |
|----------------------------|-----|-------|---|---|
| _geom_bond_site_symmetry_2 |     |       |   |   |
| _ccdc_geom_bond_type       |     |       |   |   |
|                            |     |       |   |   |
| C1                         | O2  | 1.244 | . | D |
| C1                         | N3  | 1.375 | . | S |
| C1                         | N6  | 1.378 | . | S |
| N3                         | H4  | 1.024 | . | S |
| N3                         | H5  | 1.012 | . | S |
| N6                         | H7  | 1.016 | . | S |
| N6                         | H8  | 1.018 | . | S |
| C9                         | O10 | 1.254 | . | D |
| C9                         | N11 | 1.409 | . | S |
| C9                         | N14 | 1.342 | . | S |
| N11                        | H12 | 1.017 | . | S |
| N11                        | H13 | 1.023 | . | S |
| N14                        | H15 | 1.019 | . | S |
| N14                        | H16 | 1.015 | . | S |
| C17                        | O18 | 1.239 | . | D |
| C17                        | N19 | 1.384 | . | S |
| C17                        | N22 | 1.384 | . | S |
| N19                        | H20 | 1.020 | . | S |
| N19                        | H21 | 1.017 | . | S |
| N22                        | H23 | 1.016 | . | S |
| N22                        | H24 | 1.017 | . | S |
| C25                        | O26 | 1.264 | . | D |
| C25                        | N27 | 1.357 | . | S |
| C25                        | N30 | 1.371 | . | S |
| N27                        | H28 | 1.025 | . | S |
| N27                        | H29 | 1.015 | . | S |
| N30                        | H31 | 1.021 | . | S |
| N30                        | H32 | 1.017 | . | S |
| H33                        | O35 | 0.970 | . | S |
| H34                        | O35 | 0.988 | . | S |
| H36                        | O38 | 0.990 | . | S |
| H37                        | O38 | 0.981 | . | S |
| H39                        | O41 | 0.980 | . | S |
| H40                        | O41 | 0.975 | . | S |
| H42                        | O44 | 0.985 | . | S |
| H43                        | O44 | 0.990 | . | S |
| H45                        | O47 | 0.985 | . | S |
| H46                        | O47 | 0.993 | . | S |
| H48                        | O50 | 0.970 | . | S |
| H49                        | O50 | 0.980 | . | S |

```

data_ Urea-amorphous-2 (CH4N2O) -8 (H2O)
_audit_creation_date          2021-07-28
_audit_creation_method        'Materials Studio'
_symmetry_space_group_name_H-M 'P1'
_symmetry_Int_Tables_number    1
_symmetry_cell_setting         triclinic
loop_
_symmetry_equiv_pos_as_xyz
  x,y,z
_cell_length_a                 6.9562
_cell_length_b                 7.2417
_cell_length_c                 8.1067
_cell_angle_alpha              97.6885
_cell_angle_beta               90.5171
_cell_angle_gamma              81.7704
loop_
_atom_site_label
_atom_site_type_symbol
_atom_site_fract_x
_atom_site_fract_y
_atom_site_fract_z
_atom_site_U_iso_or_equiv
_atom_site_adp_type
_atom_site_occupancy
C1      C      0.17947  0.66524  0.93123  0.00000  Uiso  1.00
O2      O      0.12274  0.79412  0.84337  0.00000  Uiso  1.00
N3      N      0.30222  0.69215  1.06022  0.00000  Uiso  1.00
H4      H      0.34062  0.82171  1.09043  0.00000  Uiso  1.00
H5      H      0.32938  0.60196  1.14642  0.00000  Uiso  1.00
N6      N      0.11332  0.49438  0.90430  0.00000  Uiso  1.00
H7      H      0.04372  0.45519  0.79711  0.00000  Uiso  1.00
H8      H      0.17536  0.38912  0.96829  0.00000  Uiso  1.00
C9      C      0.12895  0.21223  0.21239  0.00000  Uiso  1.00
O10     O      0.27357  0.26939  0.15266  0.00000  Uiso  1.00
N11     N      0.02392  0.09401  0.11942  0.00000  Uiso  1.00
H12     H      0.07267  0.03158  0.00459  0.00000  Uiso  1.00
H13     H      -0.10613  0.06649  0.15876  0.00000  Uiso  1.00
N14     N      0.07610  0.26213  0.37762  0.00000  Uiso  1.00
H15     H      0.10188  0.39247  0.43082  0.00000  Uiso  1.00
H16     H      -0.05403  0.23099  0.41454  0.00000  Uiso  1.00
H17     H      0.65000  0.97044  0.91762  0.00000  Uiso  1.00
H18     H      0.84088  0.83180  0.90514  0.00000  Uiso  1.00
O19     O      0.71892  0.86299  0.96658  0.00000  Uiso  1.00
H20     H      0.88205  0.51516  0.05516  0.00000  Uiso  1.00
H21     H      0.69931  0.65111  0.10635  0.00000  Uiso  1.00
O22     O      0.78188  0.54379  0.14163  0.00000  Uiso  1.00
H23     H      0.38375  -0.08589  0.53693  0.00000  Uiso  1.00
H24     H      0.25408  0.10432  0.51288  0.00000  Uiso  1.00
O25     O      0.31872  0.03211  0.59649  0.00000  Uiso  1.00
H26     H      0.31294  0.64023  0.44518  0.00000  Uiso  1.00
H27     H      0.52257  0.53758  0.40375  0.00000  Uiso  1.00
O28     O      0.43996  0.65835  0.40414  0.00000  Uiso  1.00
H29     H      0.51620  0.25467  0.25060  0.00000  Uiso  1.00
H30     H      0.69140  0.35767  0.22228  0.00000  Uiso  1.00
O31     O      0.64431  0.27395  0.29400  0.00000  Uiso  1.00
H32     H      0.45869  0.13601  0.74798  0.00000  Uiso  1.00
H33     H      0.46443  0.23490  0.93230  0.00000  Uiso  1.00
O34     O      0.54630  0.17866  0.83781  0.00000  Uiso  1.00
H35     H      0.08207  0.71693  0.64064  0.00000  Uiso  1.00
H36     H      -0.03113  0.71942  0.47092  0.00000  Uiso  1.00
O37     O      0.07355  0.65059  0.52616  0.00000  Uiso  1.00
H38     H      0.79550  0.19994  0.75970  0.00000  Uiso  1.00
H39     H      1.00803  0.09919  0.71975  0.00000  Uiso  1.00
O40     O      0.91758  0.21035  0.70566  0.00000  Uiso  1.00
loop_
_geom_bond_atom_site_label_1
_geom_bond_atom_site_label_2
_geom_bond_distance
_geom_bond_site_symmetry_2
_ccdc_geom_bond_type
C1      O2      1.266  .      D
C1      N3      1.356  .      S
C1      N6      1.371  .      S
N3      H4      1.010  .      S
N3      H5      1.017  .      S
N6      H7      1.018  .      S
N6      H8      1.022  .      S

```



|     |     |       |   |   |
|-----|-----|-------|---|---|
| C9  | O10 | 1.265 | . | D |
| C9  | N11 | 1.353 | . | S |
| C9  | N14 | 1.379 | . | S |
| N11 | H12 | 1.017 | . | S |
| N11 | H13 | 1.017 | . | S |
| N14 | H15 | 1.023 | . | S |
| N14 | H16 | 1.020 | . | S |
| H17 | O19 | 0.982 | . | S |
| H18 | O19 | 0.970 | . | S |
| H20 | O22 | 0.974 | . | S |
| H21 | O22 | 0.972 | . | S |
| H23 | O25 | 0.975 | . | S |
| H24 | O25 | 0.978 | . | S |
| H26 | O28 | 0.979 | . | S |
| H27 | O28 | 0.975 | . | S |
| H29 | O31 | 0.977 | . | S |
| H30 | O31 | 0.984 | . | S |
| H32 | O34 | 0.991 | . | S |
| H33 | O34 | 0.967 | . | S |
| H35 | O37 | 0.992 | . | S |
| H36 | O37 | 0.964 | . | S |
| H38 | O40 | 0.976 | . | S |
| H39 | O40 | 0.967 | . | S |

```

data_Urea-amorphous-6 (CH4N2O)-4 (H2O)
_audit_creation_date      2021-07-28
_audit_creation_method    'Materials Studio'
_symmetry_space_group_name_H-M  'P1'
_symmetry_Int_Tables_number  1
_symmetry_cell_setting    triclinic
loop_
_symmetry_equiv_pos_as_xyz
  x,y,z
_cell_length_a            8.4388
_cell_length_b            7.6379
_cell_length_c            8.3070
_cell_angle_alpha        91.2161
_cell_angle_beta         87.6183
_cell_angle_gamma        85.0385
loop_
_atom_site_label
_atom_site_type_symbol
_atom_site_fract_x
_atom_site_fract_y
_atom_site_fract_z
_atom_site_U_iso_or_equiv
_atom_site_adp_type
_atom_site_occupancy
C1      C      0.51590  0.36573  0.50096  0.00000  Uiso  1.00
O2      O      0.45024  0.33156  0.63418  0.00000  Uiso  1.00
N3      N      0.66799  0.29524  0.46062  0.00000  Uiso  1.00
H4      H      0.74068  0.27362  0.55555  0.00000  Uiso  1.00
H5      H      0.72478  0.34180  0.36268  0.00000  Uiso  1.00
N6      N      0.43928  0.46833  0.39118  0.00000  Uiso  1.00
H7      H      0.31788  0.49177  0.40727  0.00000  Uiso  1.00
H8      H      0.48217  0.46595  0.27534  0.00000  Uiso  1.00
C9      C      0.79189  0.71648  0.07968  0.00000  Uiso  1.00
O10     O      0.80350  0.87317  0.04191  0.00000  Uiso  1.00
N11     N      0.73180  0.59724  -0.01984  0.00000  Uiso  1.00
H12     H      0.68708  0.64395  -0.12659  0.00000  Uiso  1.00
H13     H      0.67410  0.49613  0.02583  0.00000  Uiso  1.00
N14     N      0.83590  0.65841  0.22990  0.00000  Uiso  1.00
H15     H      0.89407  0.74458  0.29447  0.00000  Uiso  1.00
H16     H      0.88053  0.53160  0.24143  0.00000  Uiso  1.00
C17     C      0.08889  0.72011  0.51937  0.00000  Uiso  1.00
O18     O      0.10646  0.57141  0.44991  0.00000  Uiso  1.00
N19     N      -0.04171  0.76948  0.61839  0.00000  Uiso  1.00
H20     H      -0.12629  0.68370  0.63626  0.00000  Uiso  1.00
H21     H      -0.03479  0.86302  0.70562  0.00000  Uiso  1.00
N22     N      0.19161  0.84534  0.48859  0.00000  Uiso  1.00
H23     H      0.30590  0.80291  0.45391  0.00000  Uiso  1.00
H24     H      0.18334  0.95588  0.56091  0.00000  Uiso  1.00
C25     C      0.20693  0.69479  0.95493  0.00000  Uiso  1.00
O26     O      0.22255  0.82105  0.86458  0.00000  Uiso  1.00
N27     N      0.25518  0.69429  1.11102  0.00000  Uiso  1.00
H28     H      0.29081  0.80914  1.15435  0.00000  Uiso  1.00
H29     H      0.20948  0.61124  1.19120  0.00000  Uiso  1.00
N30     N      0.13857  0.54695  0.90462  0.00000  Uiso  1.00
H31     H      0.12248  0.53311  0.78521  0.00000  Uiso  1.00
H32     H      0.15179  0.43650  0.97101  0.00000  Uiso  1.00
C33     C      0.59010  0.83732  0.63561  0.00000  Uiso  1.00
O34     O      0.63441  0.68461  0.67614  0.00000  Uiso  1.00
N35     N      0.57355  0.97681  0.74194  0.00000  Uiso  1.00
H36     H      0.61713  0.95842  0.85272  0.00000  Uiso  1.00
H37     H      0.54814  1.10233  0.70551  0.00000  Uiso  1.00
N38     N      0.55073  0.86985  0.47909  0.00000  Uiso  1.00
H39     H      0.58680  0.77138  0.39859  0.00000  Uiso  1.00
H40     H      0.54820  0.99296  0.43435  0.00000  Uiso  1.00
C41     C      0.10842  0.20896  0.19980  0.00000  Uiso  1.00
O42     O      0.21598  0.30677  0.16446  0.00000  Uiso  1.00
N43     N      0.07697  0.07113  0.10520  0.00000  Uiso  1.00
H44     H      0.15145  0.03230  0.00941  0.00000  Uiso  1.00
H45     H      -0.02341  0.00597  0.11793  0.00000  Uiso  1.00
N46     N      0.00998  0.24216  0.33712  0.00000  Uiso  1.00
H47     H      0.04273  0.33639  0.41510  0.00000  Uiso  1.00
H48     H      -0.03512  0.13707  0.38883  0.00000  Uiso  1.00
H49     H      1.00029  0.23543  0.73518  0.00000  Uiso  1.00
H50     H      0.86448  0.36959  0.80751  0.00000  Uiso  1.00
O51     O      0.89136  0.28587  0.71958  0.00000  Uiso  1.00
H52     H      0.44942  0.11798  0.12362  0.00000  Uiso  1.00
H53     H      0.59809  -0.01185  0.11957  0.00000  Uiso  1.00

```

|                              |     |         |         |         |         |      |      |
|------------------------------|-----|---------|---------|---------|---------|------|------|
| O54                          | O   | 0.49086 | 0.00823 | 0.16784 | 0.00000 | Uiso | 1.00 |
| H55                          | H   | 0.39310 | 0.35808 | 1.02109 | 0.00000 | Uiso | 1.00 |
| H56                          | H   | 0.49237 | 0.36113 | 0.86128 | 0.00000 | Uiso | 1.00 |
| O57                          | O   | 0.50153 | 0.34000 | 0.97609 | 0.00000 | Uiso | 1.00 |
| H58                          | H   | 0.25284 | 0.04649 | 0.77723 | 0.00000 | Uiso | 1.00 |
| H59                          | H   | 0.28696 | 0.21696 | 0.68275 | 0.00000 | Uiso | 1.00 |
| O60                          | O   | 0.20245 | 0.14383 | 0.71860 | 0.00000 | Uiso | 1.00 |
| loop_                        |     |         |         |         |         |      |      |
| _geom_bond_atom_site_label_1 |     |         |         |         |         |      |      |
| _geom_bond_atom_site_label_2 |     |         |         |         |         |      |      |
| _geom_bond_distance          |     |         |         |         |         |      |      |
| _geom_bond_site_symmetry_2   |     |         |         |         |         |      |      |
| _ccdc_geom_bond_type         |     |         |         |         |         |      |      |
| C1                           | O2  | 1.259   | .       | D       |         |      |      |
| C1                           | N3  | 1.373   | .       | S       |         |      |      |
| C1                           | N6  | 1.362   | .       | S       |         |      |      |
| N3                           | H4  | 1.026   | .       | S       |         |      |      |
| N3                           | H5  | 1.014   | .       | S       |         |      |      |
| N6                           | H7  | 1.027   | .       | S       |         |      |      |
| N6                           | H8  | 1.013   | .       | S       |         |      |      |
| C9                           | O10 | 1.255   | .       | D       |         |      |      |
| C9                           | N11 | 1.361   | .       | S       |         |      |      |
| C9                           | N14 | 1.388   | .       | S       |         |      |      |
| N11                          | H12 | 1.036   | .       | S       |         |      |      |
| N11                          | H13 | 1.020   | .       | S       |         |      |      |
| N14                          | H15 | 1.012   | .       | S       |         |      |      |
| N14                          | H16 | 1.016   | .       | S       |         |      |      |
| C17                          | O18 | 1.257   | .       | D       |         |      |      |
| C17                          | N19 | 1.369   | .       | S       |         |      |      |
| C17                          | N22 | 1.366   | .       | S       |         |      |      |
| N19                          | H20 | 1.018   | .       | S       |         |      |      |
| N19                          | H21 | 1.014   | .       | S       |         |      |      |
| N22                          | H23 | 1.018   | .       | S       |         |      |      |
| N22                          | H24 | 1.021   | .       | S       |         |      |      |
| C25                          | O26 | 1.247   | .       | D       |         |      |      |
| C25                          | N27 | 1.375   | .       | S       |         |      |      |
| C25                          | N30 | 1.377   | .       | S       |         |      |      |
| N27                          | H28 | 1.015   | .       | S       |         |      |      |
| N27                          | H29 | 1.017   | .       | S       |         |      |      |
| N30                          | H31 | 1.011   | .       | S       |         |      |      |
| N30                          | H32 | 1.018   | .       | S       |         |      |      |
| C33                          | O34 | 1.251   | .       | D       |         |      |      |
| C33                          | N35 | 1.363   | .       | S       |         |      |      |
| C33                          | N38 | 1.378   | .       | S       |         |      |      |
| N35                          | H36 | 1.013   | .       | S       |         |      |      |
| N35                          | H37 | 1.019   | .       | S       |         |      |      |
| N38                          | H39 | 1.014   | .       | S       |         |      |      |
| N38                          | H40 | 1.017   | .       | S       |         |      |      |
| C41                          | O42 | 1.254   | .       | D       |         |      |      |
| C41                          | N43 | 1.352   | .       | S       |         |      |      |
| C41                          | N46 | 1.389   | .       | S       |         |      |      |
| N43                          | H44 | 1.016   | .       | S       |         |      |      |
| N43                          | H45 | 1.022   | .       | S       |         |      |      |
| N46                          | H47 | 1.021   | .       | S       |         |      |      |
| N46                          | H48 | 1.014   | .       | S       |         |      |      |
| H49                          | O51 | 0.980   | .       | S       |         |      |      |
| H50                          | O51 | 0.967   | .       | S       |         |      |      |
| H52                          | O54 | 0.966   | .       | S       |         |      |      |
| H53                          | O54 | 0.973   | .       | S       |         |      |      |
| H55                          | O57 | 0.971   | .       | S       |         |      |      |
| H56                          | O57 | 0.976   | .       | S       |         |      |      |
| H58                          | O60 | 0.974   | .       | S       |         |      |      |
| H59                          | O60 | 0.984   | .       | S       |         |      |      |

```

data_ Urea-amorphous-2 (CH4N2O)-8 (H2O)- 2
_audit_creation_date      2021-07-28
_audit_creation_method    'Materials Studio'
_symmetry_space_group_name_H-M  'P1'
_symmetry_Int_Tables_number  1
_symmetry_cell_setting    triclinic
loop_
_symmetry_equiv_pos_as_xyz
  x,y,z
_cell_length_a            7.0485
_cell_length_b            6.6383
_cell_length_c            7.3761
_cell_angle_alpha        100.2057
_cell_angle_beta         90.3297
_cell_angle_gamma        95.6338
loop_
_atom_site_label
_atom_site_type_symbol
_atom_site_fract_x
_atom_site_fract_y
_atom_site_fract_z
_atom_site_U_iso_or_equiv
_atom_site_adp_type
_atom_site_occupancy
C1      C      0.40377  0.18296  0.83019  0.00000  Uiso  1.00
O2      O      0.28776  0.15923  0.69630  0.00000  Uiso  1.00
N3      N      0.37635  0.06411  0.96640  0.00000  Uiso  1.00
H4      H      0.24145  -0.00772  0.96250  0.00000  Uiso  1.00
H5      H      0.43237  0.12367  1.09696  0.00000  Uiso  1.00
N6      N      0.56309  0.31650  0.84402  0.00000  Uiso  1.00
H7      H      0.58699  0.39857  0.74163  0.00000  Uiso  1.00
H8      H      0.66484  0.33234  0.94741  0.00000  Uiso  1.00
C9      C     -0.07226  0.02944  0.39613  0.00000  Uiso  1.00
O10     O     -0.20665  -0.04539  0.28136  0.00000  Uiso  1.00
N11     N     -0.09849  0.05568  0.58169  0.00000  Uiso  1.00
H12     H     -0.21132  -0.02810  0.62793  0.00000  Uiso  1.00
H13     H      0.01955  0.09506  0.66677  0.00000  Uiso  1.00
N14     N      0.10146  0.09454  0.33596  0.00000  Uiso  1.00
H15     H      0.10171  0.13331  0.20915  0.00000  Uiso  1.00
H16     H      0.21001  0.15951  0.42561  0.00000  Uiso  1.00
H17     H      0.42596  0.63293  0.15689  0.00000  Uiso  1.00
H18     H      0.60546  0.74716  0.27684  0.00000  Uiso  1.00
O19     O      0.49739  0.64119  0.27287  0.00000  Uiso  1.00
H20     H      0.25521  0.87492  0.59289  0.00000  Uiso  1.00
H21     H      0.33065  0.70597  0.44192  0.00000  Uiso  1.00
O22     O      0.25662  0.72594  0.55626  0.00000  Uiso  1.00
H23     H      0.13943  0.68364  0.96226  0.00000  Uiso  1.00
H24     H      0.28378  0.55019  0.85269  0.00000  Uiso  1.00
O25     O      0.23290  0.58444  0.97446  0.00000  Uiso  1.00
H26     H      0.89872  0.88134  0.06196  0.00000  Uiso  1.00
H27     H      0.86923  0.79516  -0.14653  0.00000  Uiso  1.00
O28     O      0.96891  0.84548  -0.05272  0.00000  Uiso  1.00
H29     H      0.89108  0.40844  0.53884  0.00000  Uiso  1.00
H30     H      1.02167  0.60030  0.50859  0.00000  Uiso  1.00
O31     O      0.89282  0.52822  0.48064  0.00000  Uiso  1.00
H32     H      0.99997  0.42786  0.04805  0.00000  Uiso  1.00
H33     H      0.88786  0.43235  0.22904  0.00000  Uiso  1.00
O34     O      0.88761  0.36394  0.09954  0.00000  Uiso  1.00
H35     H      0.54131  0.85435  0.84945  0.00000  Uiso  1.00
H36     H      0.52677  0.72420  0.65710  0.00000  Uiso  1.00
O37     O      0.61791  0.77438  0.75812  0.00000  Uiso  1.00
H38     H      0.62591  0.16196  0.32161  0.00000  Uiso  1.00
H39     H      0.55205  0.37882  0.31647  0.00000  Uiso  1.00
O40     O      0.51367  0.23751  0.33163  0.00000  Uiso  1.00
loop_
_geom_bond_atom_site_label_1
_geom_bond_atom_site_label_2
_geom_bond_distance
_geom_bond_site_symmetry_2
_ccdc_geom_bond_type
C1      O2      1.257  .  D
C1      N3      1.387  .  S
C1      N6      1.352  .  S
N3      H4      1.019  .  S
N3      H5      1.034  .  S
N6      H7      1.012  .  S
N6      H8      1.028  .  S

```

|     |     |       |   |   |
|-----|-----|-------|---|---|
| C9  | O10 | 1.269 | . | D |
| C9  | N11 | 1.365 | . | S |
| C9  | N14 | 1.361 | . | S |
| N11 | H12 | 1.021 | . | S |
| N11 | H13 | 1.024 | . | S |
| N14 | H15 | 1.013 | . | S |
| N14 | H16 | 1.018 | . | S |
| H17 | O19 | 0.980 | . | S |
| H18 | O19 | 0.981 | . | S |
| H20 | O22 | 0.979 | . | S |
| H21 | O22 | 0.990 | . | S |
| H23 | O25 | 0.991 | . | S |
| H24 | O25 | 0.967 | . | S |
| H26 | O28 | 0.987 | . | S |
| H27 | O28 | 0.975 | . | S |
| H29 | O31 | 0.967 | . | S |
| H30 | O31 | 0.987 | . | S |
| H32 | O34 | 0.973 | . | S |
| H33 | O34 | 0.982 | . | S |
| H35 | O37 | 0.980 | . | S |
| H36 | O37 | 0.971 | . | S |
| H38 | O40 | 0.974 | . | S |
| H39 | O40 | 0.976 | . | S |

```

Urea-amorphous-2 (CH4N2O) - 8 (H2O) - 3
_audit_creation_date      2021-09-23
_audit_creation_method    'Materials Studio'
_symmetry_space_group_name_H-M 'P1'
_symmetry_Int_Tables_number 1
_symmetry_cell_setting    triclinic
loop_
_symmetry_equiv_pos_as_xyz
  x,y,z
_cell_length_a            6.7560
_cell_length_b            6.9667
_cell_length_c            6.9490
_cell_angle_alpha        97.7466
_cell_angle_beta         92.0759
_cell_angle_gamma        91.5831
loop_
_atom_site_label
_atom_site_type_symbol
_atom_site_fract_x
_atom_site_fract_y
_atom_site_fract_z
_atom_site_U_iso_or_equiv
_atom_site_adp_type
_atom_site_occupancy
C1      C      0.62459  0.05760  0.27578  0.00000  Uiso  1.00
O2      O      0.51661 -0.09062  0.28157  0.00000  Uiso  1.00
N3      N      0.62467  0.21145  0.42370  0.00000  Uiso  1.00
H4      H      0.49851  0.22689  0.50007  0.00000  Uiso  1.00
H5      H      0.70043  0.33643  0.40919  0.00000  Uiso  1.00
N6      N      0.75360  0.07110  0.13304  0.00000  Uiso  1.00
H7      H      0.74269 -0.02810  0.01208  0.00000  Uiso  1.00
H8      H      0.82265  0.19985  0.11875  0.00000  Uiso  1.00
C9      C      0.38336  0.74390  0.71211  0.00000  Uiso  1.00
O10     O      0.46908  0.62622  0.59042  0.00000  Uiso  1.00
N11     N      0.21425  0.68686  0.79797  0.00000  Uiso  1.00
H12     H      0.18762  0.54164  0.78836  0.00000  Uiso  1.00
H13     H      0.17492  0.76356  0.92474  0.00000  Uiso  1.00
N14     N      0.45070  0.92899  0.76244  0.00000  Uiso  1.00
H15     H      0.56943  0.97535  0.69501  0.00000  Uiso  1.00
H16     H      0.37839  1.02704  0.85552  0.00000  Uiso  1.00
H17     H      0.14288  0.16137  0.47841  0.00000  Uiso  1.00
H18     H      0.16199  0.38360  0.47364  0.00000  Uiso  1.00
O19     O      0.19153  0.28425  0.55356  0.00000  Uiso  1.00
H20     H      0.42811  0.48684  1.29034  0.00000  Uiso  1.00
H21     H      0.47148  0.66592  1.19074  0.00000  Uiso  1.00
O22     O      0.42416  0.53006  1.16395  0.00000  Uiso  1.00
H23     H      1.02808  0.84339  0.35043  0.00000  Uiso  1.00
H24     H      1.26008  0.89206  0.33389  0.00000  Uiso  1.00
O25     O      1.12528  0.93638  0.31450  0.00000  Uiso  1.00
H26     H      0.56599  0.44779  0.74778  0.00000  Uiso  1.00
H27     H      0.52585  0.40479  0.95559  0.00000  Uiso  1.00
O28     O      0.61078  0.36818  0.84513  0.00000  Uiso  1.00
H29     H      -0.09687  0.54687  0.19149  0.00000  Uiso  1.00
H30     H      -0.17557  0.45070 -0.01724  0.00000  Uiso  1.00
O31     O      -0.05880  0.46592  0.07451  0.00000  Uiso  1.00
H32     H      0.15571  0.07978  0.12682  0.00000  Uiso  1.00
H33     H      0.14440  0.28117  0.05083  0.00000  Uiso  1.00
O34     O      0.19673  0.15161  0.02204  0.00000  Uiso  1.00
H35     H      1.01975  0.06862  0.81708  0.00000  Uiso  1.00
H36     H      0.85730  0.12578  0.67571  0.00000  Uiso  1.00
O37     O      0.90983  0.01492  0.72827  0.00000  Uiso  1.00
H38     H      0.91975  0.72152  0.57942  0.00000  Uiso  1.00
H39     H      0.71176  0.67399  0.48805  0.00000  Uiso  1.00
O40     O      0.85261  0.65419  0.46201  0.00000  Uiso  1.00
loop_
_geom_bond_atom_site_label_1
_geom_bond_atom_site_label_2
_geom_bond_distance
_geom_bond_site_symmetry_2
_ccdc_geom_bond_type
C1      O2      1.254  .      D
C1      N3      1.381  .      S
C1      N6      1.355  .      S
N3      H4      1.021  .      S
N3      H5      1.016  .      S
N6      H7      1.013  .      S
N6      H8      1.018  .      S

```

|     |     |       |   |   |
|-----|-----|-------|---|---|
| C9  | O10 | 1.264 | . | D |
| C9  | N11 | 1.381 | . | S |
| C9  | N14 | 1.351 | . | S |
| N11 | H12 | 1.016 | . | S |
| N11 | H13 | 1.015 | . | S |
| N14 | H15 | 1.010 | . | S |
| N14 | H16 | 1.023 | . | S |
| H17 | O19 | 0.982 | . | S |
| H18 | O19 | 0.965 | . | S |
| H20 | O22 | 0.966 | . | S |
| H21 | O22 | 0.982 | . | S |
| H23 | O25 | 0.972 | . | S |
| H24 | O25 | 0.980 | . | S |
| H26 | O28 | 0.976 | . | S |
| H27 | O28 | 0.985 | . | S |
| H29 | O31 | 0.972 | . | S |
| H30 | O31 | 0.990 | . | S |
| H32 | O34 | 0.981 | . | S |
| H33 | O34 | 0.977 | . | S |
| H35 | O37 | 0.981 | . | S |
| H36 | O37 | 0.968 | . | S |
| H38 | O40 | 0.975 | . | S |
| H39 | O40 | 0.985 | . | S |

**Table S1. Crystal structural calculated and experimental parameters**

| Structure                                                                    | a     | b     | c     | $\alpha$ | $\beta$ | $\gamma$ | Volume Å <sup>3</sup> | Density gm/cm <sup>3</sup> |
|------------------------------------------------------------------------------|-------|-------|-------|----------|---------|----------|-----------------------|----------------------------|
| Urea-molecule optimized                                                      | 10.00 | 10.00 | 10.00 | 90.00    | 90.00   | 90.00    | 1000.00               | 0.010                      |
| Urea-crystal-Optimized                                                       | 5.45  | 5.45  | 4.71  | 90.00    | 90.00   | 90.00    | 140.08                | 1.423                      |
| Exp <sup>1</sup>                                                             | 5.66  | 5.66  | 4.71  | 90.00    | 90.00   | 90.00    | 151.00                | 1.321                      |
| Exp <sup>2</sup>                                                             | 5.56  | 5.56  | 4.68  | 90.00    | 90.00   | 90.00    | 144.67                | 1.380                      |
|                                                                              |       |       |       |          |         |          |                       |                            |
| Urea-amorphous-6 (CH <sub>4</sub> N <sub>2</sub> O) -4 (H <sub>2</sub> O)    | 8.44  | 7.64  | 8.31  | 91.22    | 87.62   | 85.04    | 532.79                | 1.35                       |
| Urea-amorphous-4 (CH <sub>4</sub> N <sub>2</sub> O) -6 (H <sub>2</sub> O)    | 7.51  | 7.28  | 8.06  | 88.89    | 90.26   | 96.31    | 438.01                | 1.32                       |
| Urea-amorphous-2 (CH <sub>4</sub> N <sub>2</sub> O) -8 (H <sub>2</sub> O)    | 6.95  | 7.24  | 8.11  | 97.69    | 90.52   | 81.77    | 400.51                | 1.09                       |
| Urea-amorphous-2 (CH <sub>4</sub> N <sub>2</sub> O) -8 (H <sub>2</sub> O) -2 | 7.04  | 6.63  | 7.37  | 100.20   | 90.32   | 95.63    | 337.93                | 1.29                       |
| Urea-amorphous-2 (CH <sub>4</sub> N <sub>2</sub> O) -8 (H <sub>2</sub> O) -3 | 6.75  | 6.96  | 6.94  | 97.74    | 92.07   | 91.58    | 323.69                | 1.35                       |

1(Worsham, Levy et al. 1957) 2(Swaminathan, Craven et al. 1984)

## Bibliography

Swaminathan, S., B. M. Craven and R. K. McMullan (1984). "The crystal structure and molecular thermal motion of urea at 12, 60 and 123 K from neutron diffraction." *Acta Crystallographica Section B* **40**(3): 300-306.

Worsham, J. E., H. A. Levy and S. W. Peterson (1957). "The positions of hydrogen atoms in urea by neutron diffraction." *Acta Crystallographica* **10**(4): 319-323.

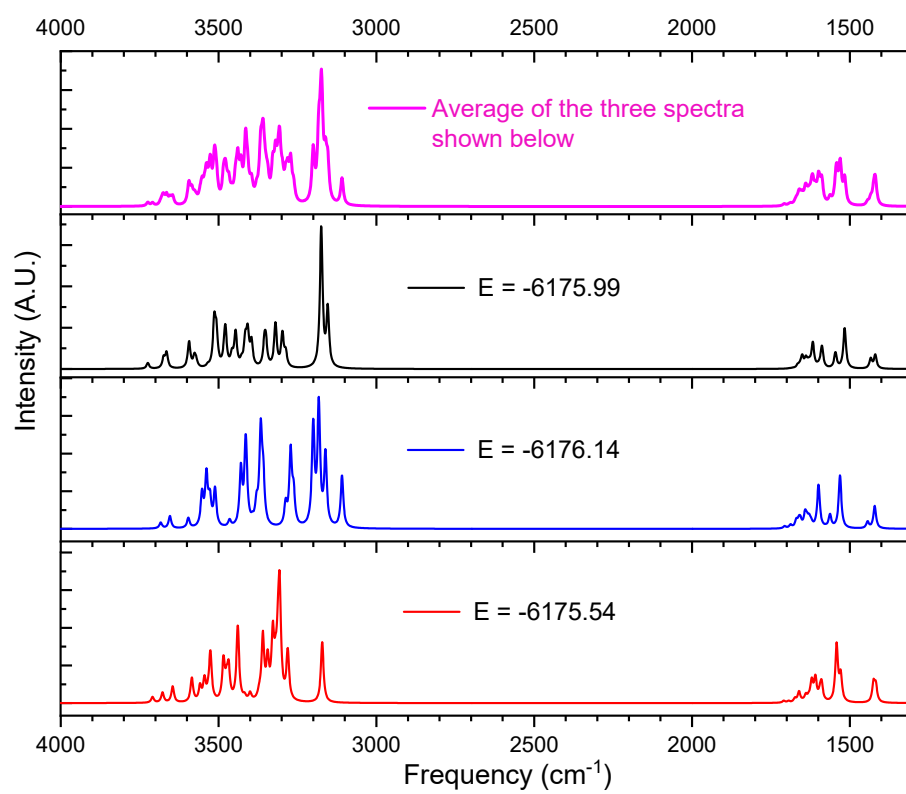

Figure S1. Calculated IR spectra of amorphous 2 urea: 8 H<sub>2</sub>O structures.
